# Supplementary material for: In Vitro Biocompatibility of Hydrogel Polyvinyl Alcohol/Moringa oleifera Leaf Extract/Graphene Oxide for Wound Dressing
Source: MDPI journal article supplement (doi:10.3390/polym15020468), 2023-01-16
Supplement: s1 [file s1]

## Supplementary Materials

### In vitro biocompatibility of hydrogel polyvinyl alcohol/moringa oleifera leaves extract/graphene oxide

Dwi Ratna Ningrum<sup>1</sup>, Wildan Hanif<sup>1</sup>, Deby Fajar Mardhian<sup>2</sup>, Lia A.T.W. Asri<sup>1\*</sup>

<sup>1</sup>Materials Science and Engineering Research Group, Faculty of Mechanical and Aerospace Engineering, Institut Teknologi Bandung, Jalan Ganesha 10, Bandung 40132, Indonesia

<sup>2</sup>Department of Dental Materials Science and Technology, Faculty of Dentistry, Universitas Padjadjaran, Sumedang 45363, Indonesia

\*lia.asri@material.itb.ac.id

#### S1. Inhibition Zone

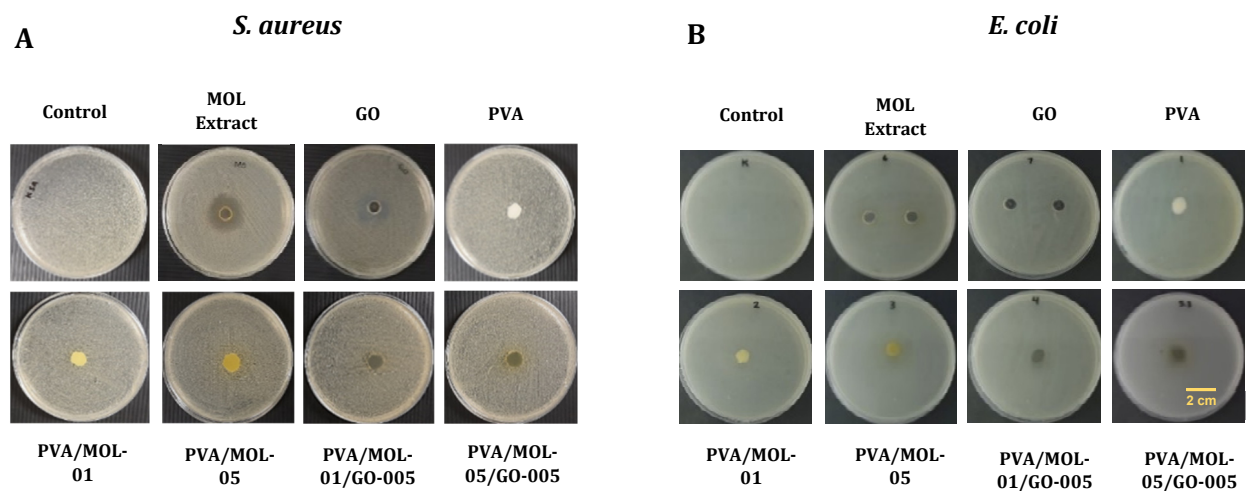

**Figure S1.** Inhibition zone of hydrogel samples using disc diffusion method with 24 hours incubation against Gram-positive bacteria (A) *Staphylococcus aureus* ATCC 6538 and Gram-negative bacteria (B) *Escherichia coli* ATCC 8939. MOL extract and GO showed inhibition zone and all hydrogels only showed clear zone under samples.

## S2. Cell Migration Assay

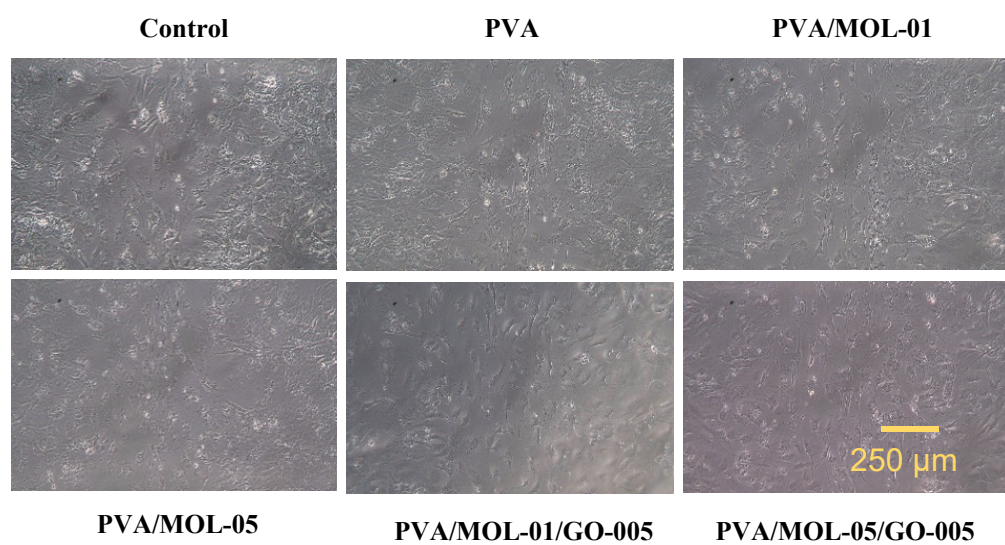

**Figure S2.** Cell migration assay of mouse fibroblast 3T3L1 cells on various hydrogel surfaces that showed complete closure of scratch areas after 24 h of incubation.
